# Supplementary material
Source: publisher figshare collection journal article supplement (https://acs.figshare.com/ndownloader/files/13564301)
Supplement: Supplementary file 1 [file 13564301]

## Supporting Information

### Indirect Nano-Construction Morphology of Ni<sub>3</sub>S<sub>2</sub> Electrodes Renovates the Performance for Electrochemical Energy Storage

Donggun Kim<sup>1</sup>, Padmanathan Karthick Kannan<sup>1</sup>, Srikanth Mateti<sup>2</sup>, and Chan-Hwa Chung<sup>1\*</sup>

<sup>1</sup> School of Chemical Engineering, Sungkyunkwan University, Suwon16419, Republic of Korea

<sup>2</sup> Institute for Frontier Materials, Deakin University, Geelong, Victoria 3216, Australia

e-mail: [chchung@skku.edu](mailto:chchung@skku.edu)

D. Kim and P.K.K contributed equally to this work

#### Calculations

The specific capacity of a single electrode was calculated from discharge profiles of the GCD curves using the following equation:

$$C_s = \frac{I \cdot \Delta t}{m}$$

where  $C_s$  is the electrode specific capacity ( $C \text{ g}^{-1}$ ),  $I$  is the constant discharge current (A),  $\Delta t$  is the discharging time (s), and  $m$  is the mass of electrodeposited material (g, combined mass of Ni(Cu) frame and Ni<sub>3</sub>S<sub>2</sub>).

For the fabrication of asymmetric supercapacitor, the mass ratio of Ni<sub>3</sub>S<sub>2</sub>/Ni and activated carbon is estimated based on charge balance theory:

$$\frac{m_+}{m_-} = \frac{C_- \times \Delta V_-}{C_+ \times \Delta V_+}$$

where  $m$  is the mass of active material,  $C$  is the specific capacitance, and  $\Delta V$  is the potential window, which were obtained based on CV curves at  $10 \text{ mV s}^{-1}$ . According to calculation, the mass ratio of Ni<sub>3</sub>S<sub>2</sub>/Ni and activated carbon was 1:3. The device specific capacitance was obtained from discharge curves of the GCD measurement according to the following equation:

$$C = \frac{I \cdot \Delta t}{\Delta V \cdot m}$$

where  $C$  is the device specific capacitance ( $F \text{ g}^{-1}$ ),  $I$  is the constant discharge current (A),  $\Delta t$  is the discharging time (s),  $\Delta V$  is the potential window excluding the IR drop (V), and  $m$  is the total mass of active materials. The energy density and power density of the asymmetric supercapacitor

were estimated by the following equations:

$$E = \frac{1}{2} C \cdot \Delta V^2$$

$$P = \frac{E}{\Delta t}$$

where  $E$  is the energy density ( $\text{W h kg}^{-1}$ ),  $C$  is the device capacitance ( $\text{F g}^{-1}$ ) obtained by the GCD curve,  $\Delta V$  is the potential window excluding the IR drop (V),  $P$  is the power density ( $\text{W kg}^{-1}$ ), and  $\Delta t$  is the discharging time (s).

Supplementary data

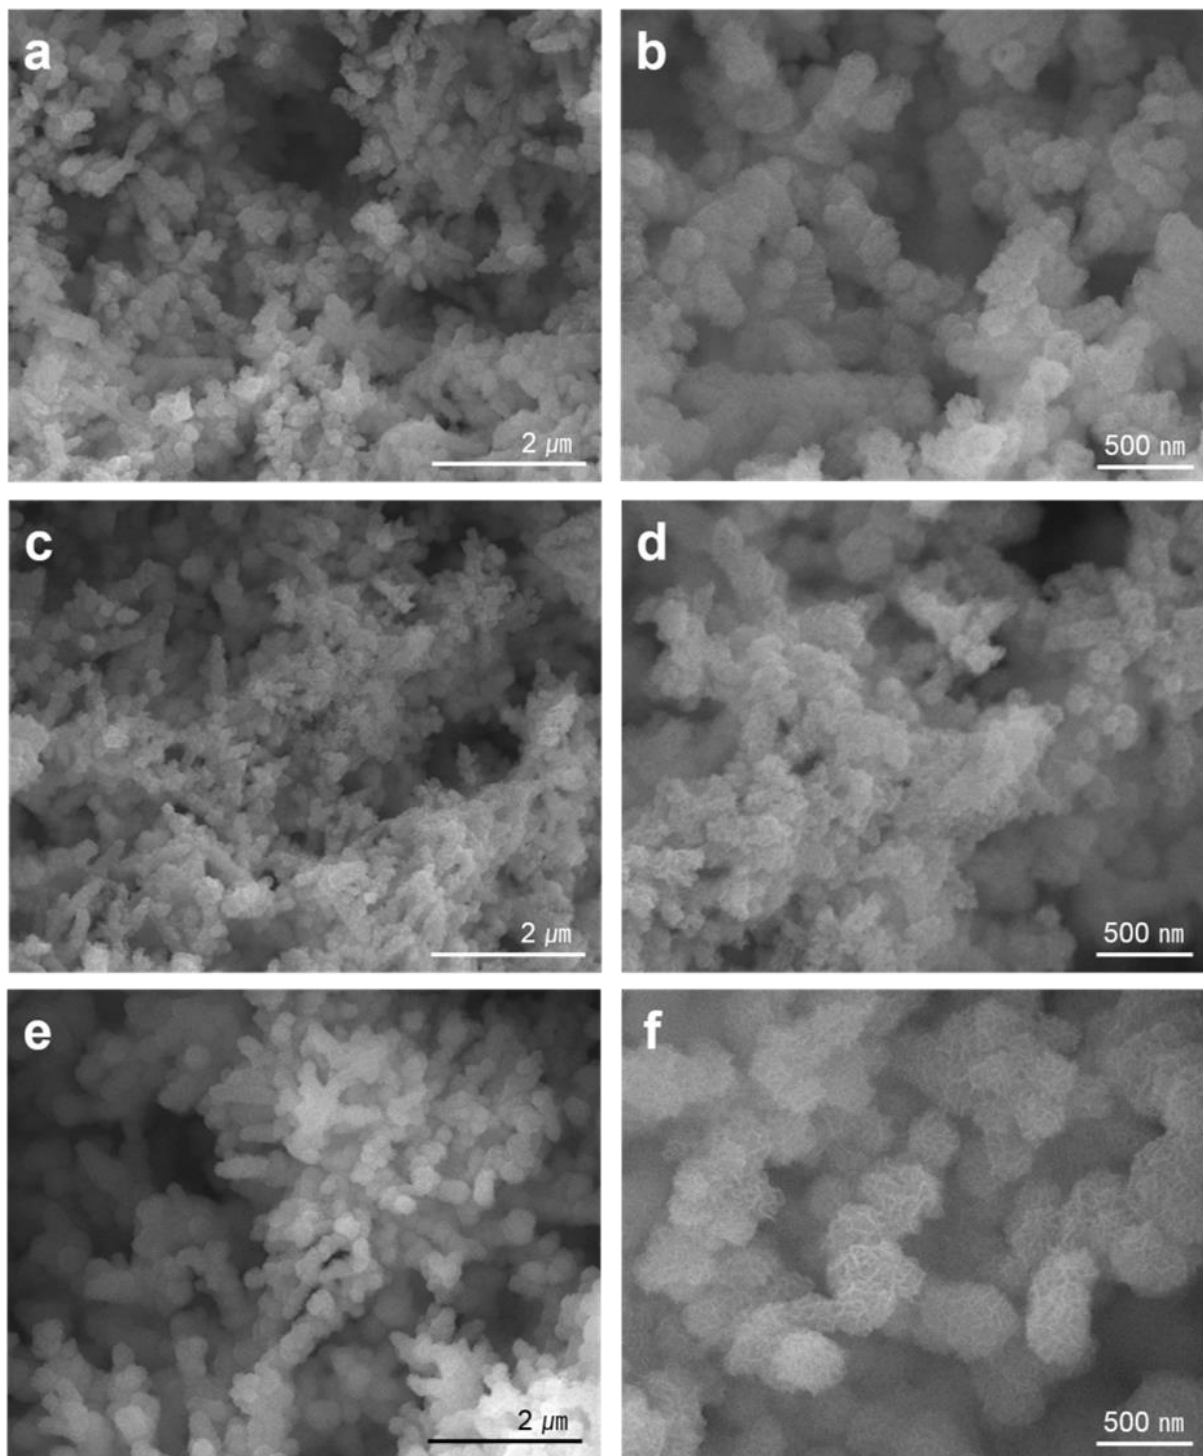

**Figure. S1** Low magnification SEM images of (a)  $\text{Ni}_3\text{S}_2/\text{Ni}$  2 min, (c)  $\text{Ni}_3\text{S}_2/\text{Ni}$  4 min, and (e)  $\text{Ni}_3\text{S}_2/\text{Ni}$  8 min electrodes. High magnification SEM images of (b)  $\text{Ni}_3\text{S}_2/\text{Ni}$  2 min, (d)  $\text{Ni}_3\text{S}_2/\text{Ni}$  4 min, and (f)  $\text{Ni}_3\text{S}_2/\text{Ni}$  8 min electrodes.

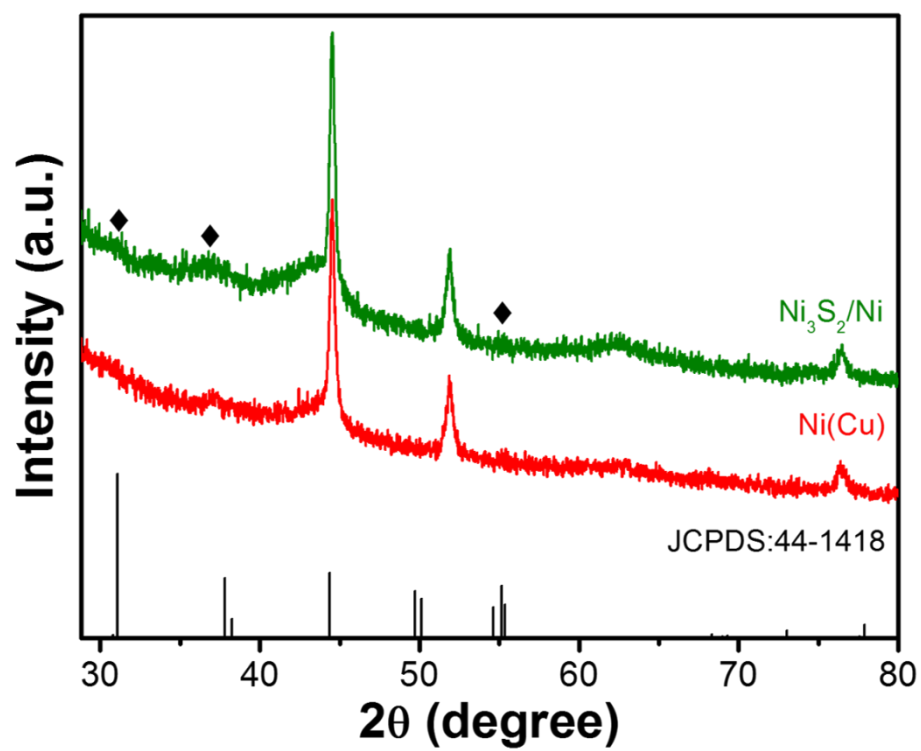

**Figure. S2** XRD patterns of the  $\text{Ni}(\text{Cu})$  frame and  $\text{Ni}_3\text{S}_2/\text{Ni}$  electrode after annealing under a nitrogen atmosphere at 300 °C for 30 min.

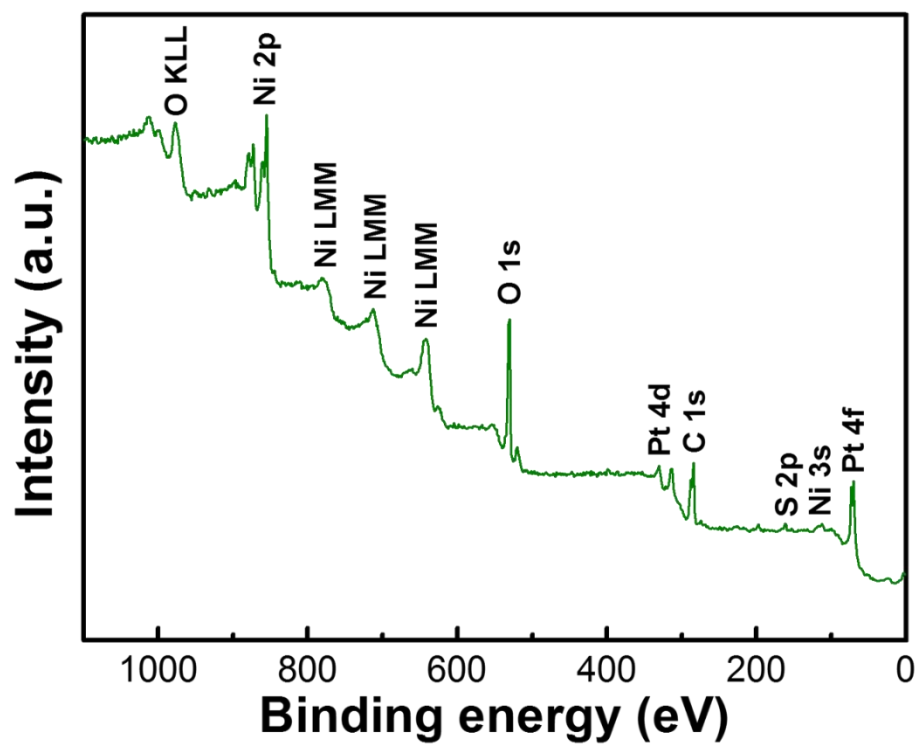

**Figure. S3** XPS survey spectrum of the  $\text{Ni}_3\text{S}_2/\text{Ni}$  6 min electrode.

Elemental peaks are observed for Ni, S, C, O, and Pt, which indicates the high purity of the electrodeposited  $\text{Ni}_3\text{S}_2/\text{Ni}$ .

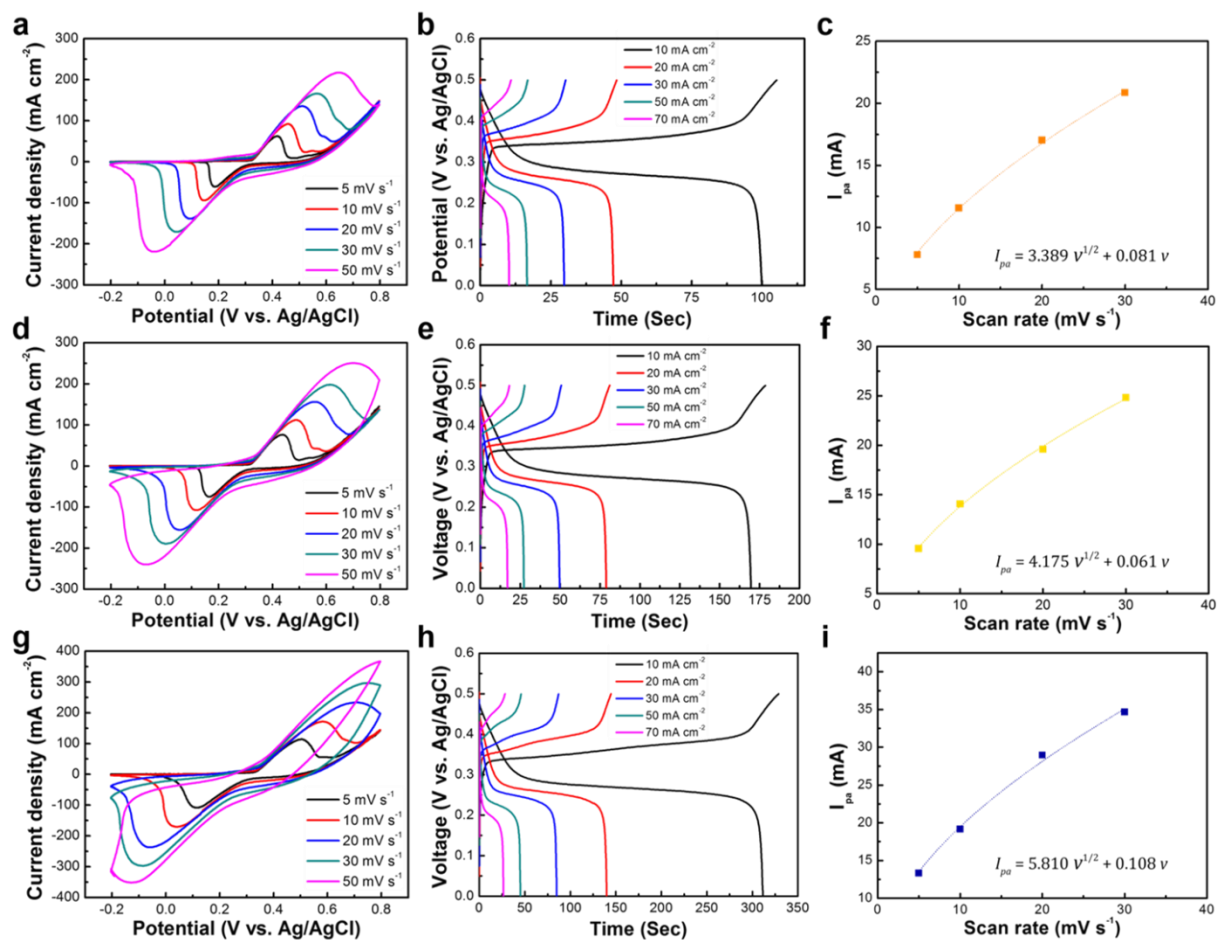

**Figure. S4** Electrochemical performances of  $\text{Ni}_3\text{S}_2/\text{Ni}$  electrodes. (a) CV curves, (b) GCD curves, and (c) peak current response as a function of scan rate of the  $\text{Ni}_3\text{S}_2/\text{Ni}$  2 min electrode. (d) CV curves, (e) GCD curves, and (f) peak current response as a function of scan rate of the  $\text{Ni}_3\text{S}_2/\text{Ni}$  4 min electrode. (g) CV curves, (h) GCD curves, and (i) peak current response as a function of scan rate of the  $\text{Ni}_3\text{S}_2/\text{Ni}$  8 min electrode.

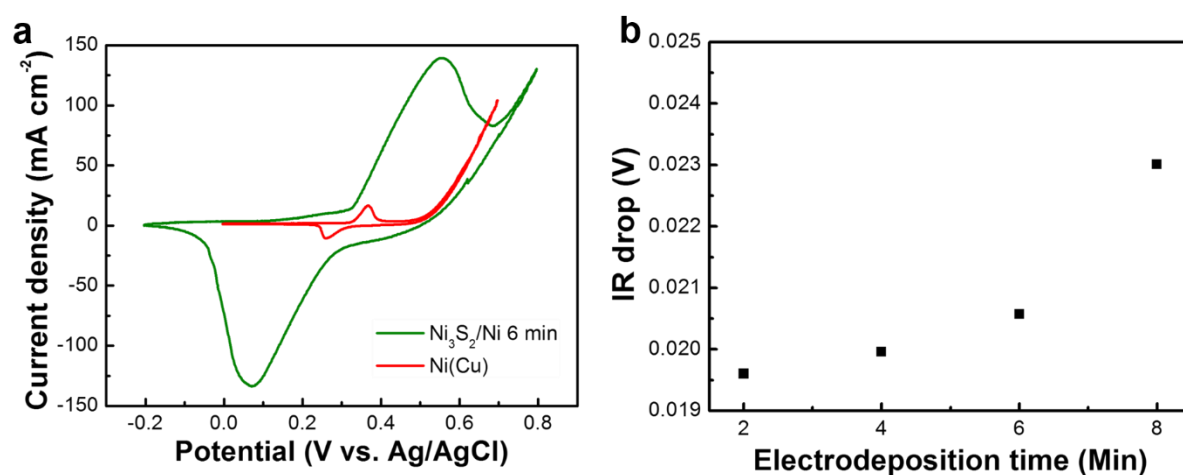

**Figure. S5** (a) CV curves of the  $\text{Ni}(\text{Cu})$  frame and  $\text{Ni}_3\text{S}_2/\text{Ni}$  6 min electrode at a scan rate of  $10 \text{ mV s}^{-1}$ . (b) IR drop of the  $\text{Ni}_3\text{S}_2/\text{Ni}$  electrodes as a function of electrodeposition time at a current density of  $10 \text{ mA cm}^{-2}$ .

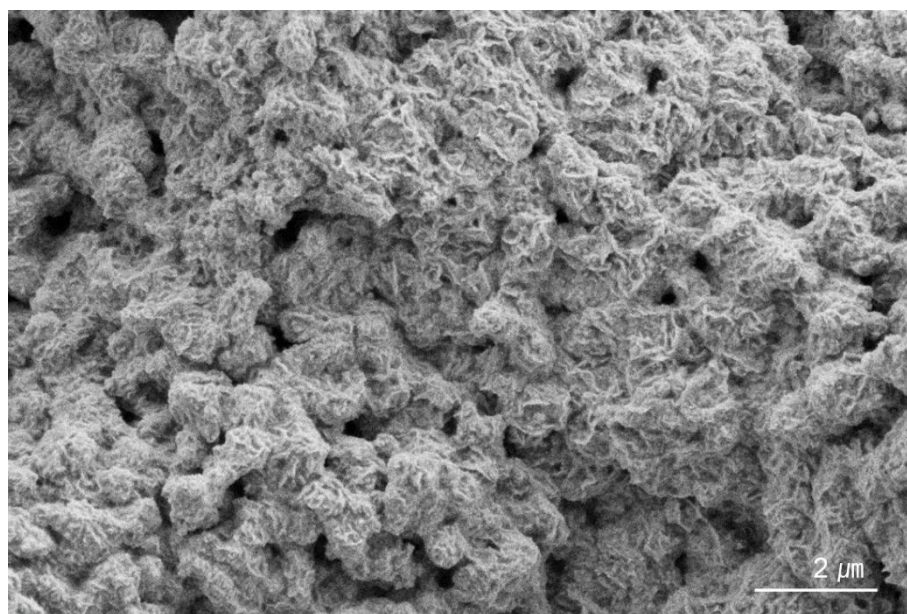

**Figure. S6** SEM images of  $\text{Ni}_3\text{S}_2/\text{Ni}$  6 min electrode after cycling stability measurement at a scan rate of  $30 \text{ mV s}^{-1}$  over 1000 cycles.

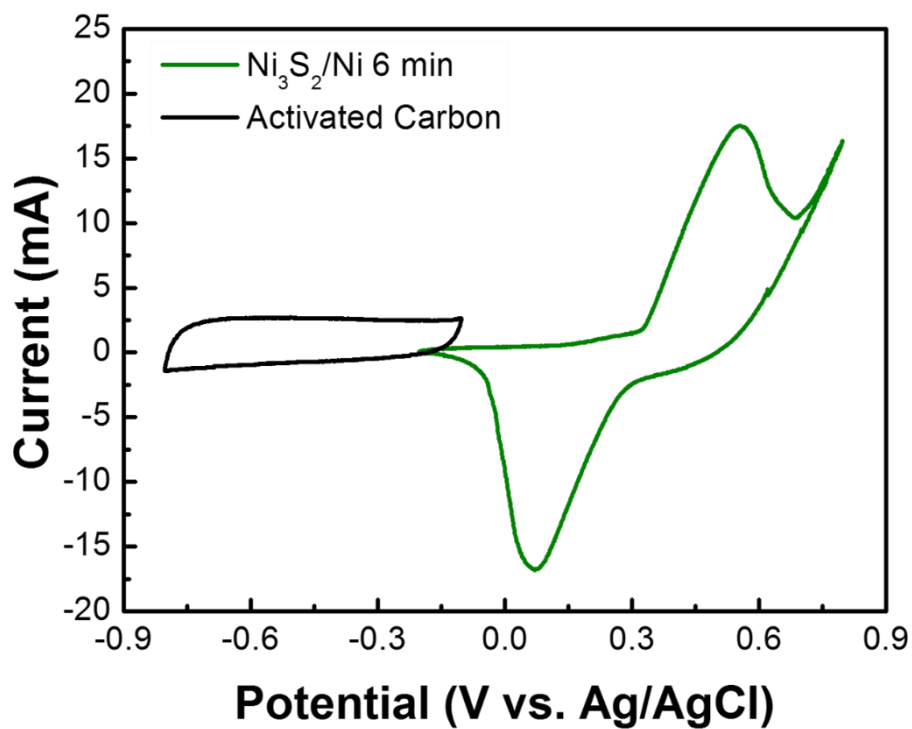

**Figure. S7** CV curves of activated carbon and  $\text{Ni}_3\text{S}_2/\text{Ni}$  6 min electrode at a scan rate of  $10 \text{ mV s}^{-1}$ .

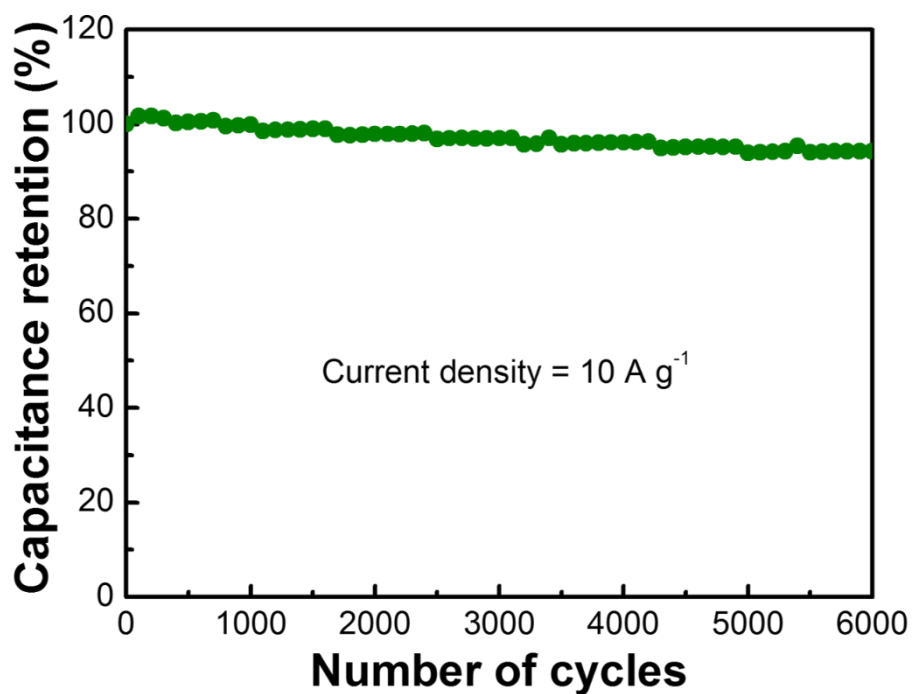

**Figure. S8** Cycling stability of the  $\text{Ni}_3\text{S}_2/\text{Ni}$  6 min//AC asymmetric supercapacitor over 6000 cycles.



**Table. S1** Comparison with previously reported electrochemical performances of nickel oxides/sulfides based electrode materials.

| Electrode materials                             | Specific capacitance                                                        | Rate capability                                           | Capacitance retention                               | Reference    |
|-------------------------------------------------|-----------------------------------------------------------------------------|-----------------------------------------------------------|-----------------------------------------------------|--------------|
| Ni <sub>3</sub> S <sub>2</sub> /Ni foam         | 1051 F g <sup>-1</sup> at 1.25 mA cm <sup>-2</sup>                          | 53 % from 2.5 to 30 mA cm <sup>-2</sup>                   | 108.3 % after 2000 cycles at 20 mA cm <sup>-2</sup> | [25]         |
| Flaky Ni <sub>3</sub> S <sub>2</sub>            | 717 F g <sup>-1</sup> at 2 A g <sup>-1</sup>                                | 57.3 % from 2 to 32 A g <sup>-1</sup>                     | 62 % after 1000 cycles at 4 A g <sup>-1</sup>       | [15]         |
| Ni@NiO dendrites                                | 1928.5 F g <sup>-1</sup> at 2 mA cm <sup>-2</sup>                           | 70.8 % from 2.9 A g <sup>-1</sup> to 58 A g <sup>-1</sup> | 100 % after 70000 cycles at 100 mV s <sup>-1</sup>  | [17]         |
| Ni <sub>3</sub> S <sub>2</sub> nanosheet arrays | 1370.4 F g <sup>-1</sup> at 2 A g <sup>-1</sup>                             | 69.5 % from 2 to 20 A g <sup>-1</sup>                     | 91.4 % after 1000 cycles at 6 A g <sup>-1</sup>     | [33]         |
| Mesostructured NiO/Ni                           | 522 C g <sup>-1</sup> at 1 A g <sub>NiO</sub> <sup>-1</sup>                 | 78 % from 1 to 50 A g <sub>NiO</sub> <sup>-1</sup>        | 97 % after 10000 cycles at 100 mV s <sup>-1</sup>   | [14]         |
| Ni <sub>3</sub> S <sub>2</sub> dendrites        | 710.4 F g <sup>-1</sup> at 2 A g <sup>-1</sup>                              | 66.2 % from 2 to 14 A g <sup>-1</sup>                     | 100 % after 2000 cycles at 5 A g <sup>-1</sup>      | [35]         |
| NiO nanosheets                                  | 993 F g <sup>-1</sup> (348 C g <sup>-1</sup> ) at 3 A g <sup>-1</sup>       | 44.8 % from 3 to 15 A g <sup>-1</sup>                     | 98.2 % after 500 cycles at 15 A g <sup>-1</sup>     | [36]         |
| Ni <sub>3</sub> S <sub>2</sub> -NiS nanowires   | 1077.3 F g <sup>-1</sup> at 5 A g <sup>-1</sup>                             | 66.8 % from 5 to 30 A g <sup>-1</sup>                     | 76.3 % after 10000 cycles at 20 A g <sup>-1</sup>   | [22]         |
| Ni <sub>3</sub> S <sub>2</sub> /Ni 6 min        | 786.5 C g <sup>-1</sup> (1645 F g <sup>-1</sup> ) at 10 mA cm <sup>-2</sup> | 64 % from 10 to 70 mA cm <sup>-2</sup>                    | 88.6 % after 1000 cycles at 30 mV s <sup>-1</sup>   | Present work |
